# Supplementary material
Source: publisher site journal article supplement (https://www.dovepress.com/article/446682)
Supplement: Supplementary file 1 [file get_supplementary_file.php]

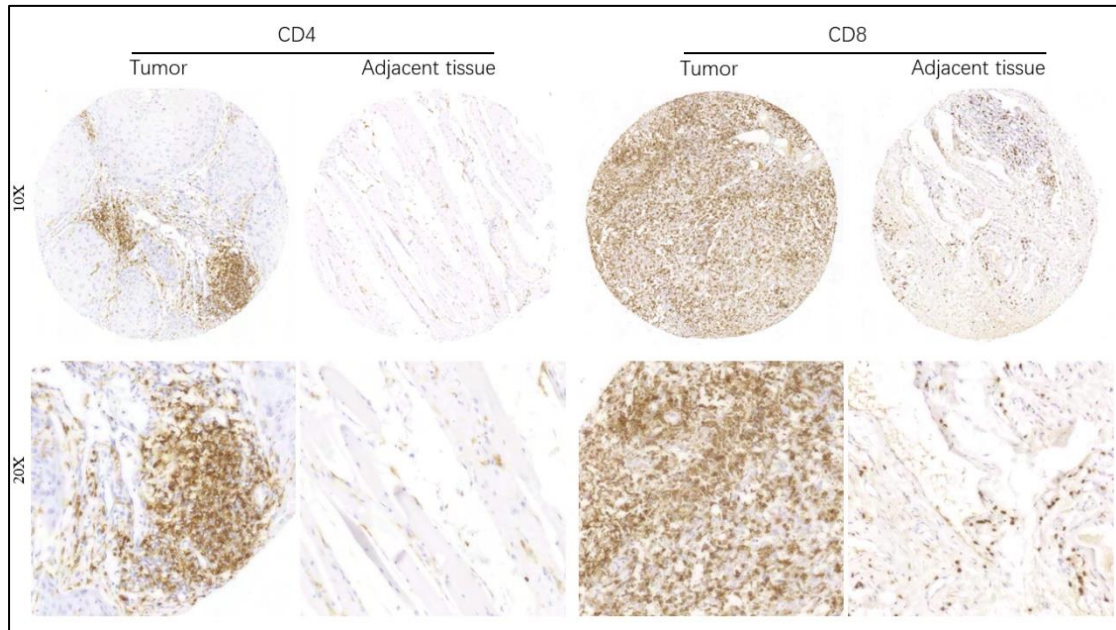

**Supplementary Figure 1. IHC stained of CD4+/CD8+ T cells in OSCC TMA.** Representative images of CD4 and CD8 IHC staining in OSCC tissue and paired adjacent tissue.
